# Supplementary material for: COVID stress syndrome: Concept, structure, and correlates
Source: PubMed Central journal article supplement (PMC7362150; doi:10.1002/da.23071), 2020-07-05
Supplement: DA-37-706-s001.pdf [file DA-37-706-s001.pdf]

## CSS Supplement

### Network Analyses

|     | Strength | Closeness | Betweenness |
|-----|----------|-----------|-------------|
| DAN | 1.142    | 0.066     | 6.000       |
| SEC | 0.886    | 0.046     | 0.000       |
| XEN | 0.661    | 0.043     | 0.000       |
| TSS | 0.780    | 0.053     | 4.000       |
| CHE | 0.690    | 0.038     | 0.000       |

99%CIs. Significant = CIs that don't overlap with zero. Bold = significantly different strengths

| Difftest   | Strength                |
|------------|-------------------------|
| DAN vs SEC | <b>-0.346 to -0.210</b> |
| DAN vs XEN | <b>-0.540 to -0.417</b> |
| DAN vs TSS | <b>-0.422 to -0.295</b> |
| DAN vs CHE | <b>-0.506 to -0.387</b> |
| SEC vs XEN | <b>-0.265 to -0.153</b> |
| SEC vs TSS | <b>-0.147 to -0.031</b> |
| SEC vs CHE | <b>-0.238 to -0.125</b> |
| XEN vs TSS | <b>0.065 to 0.171</b>   |
| XEN vs CHE | -0.026 to 0.076         |
| TSS vs CHE | <b>-0.149 to -0.034</b> |

## Fit indices for the latent class analyses

Classification variable: Total score on the COVID Stress Scales

| Number of classes | AIC             | BIC             | Adj. BIC        | BLRT:Chi-sq  | BLRT:df  | BLRT:p           |
|-------------------|-----------------|-----------------|-----------------|--------------|----------|------------------|
| 1                 | 65540.91        | 65554.57        | 65548.22        | --           | --       | --               |
| 2                 | 64241.02        | 64275.18        | 64259.29        | 1305.89      | 3        | < .001           |
| 3                 | 63998.80        | 64053.46        | 64028.04        | 248.22       | 3        | < .001           |
| 4                 | 63865.60        | 63940.76        | 63905.80        | 139.21       | 3        | < .001           |
| 5                 | <b>63803.73</b> | <b>63899.39</b> | <b>63854.90</b> | <b>67.87</b> | <b>3</b> | <b>&lt; .001</b> |
| 6                 | 63808.65        | 63924.79        | 63870.79        | 1.11         | 3        | > .10            |
| 7                 | 63815.36        | 63952.01        | 63888.45        | 0.00         | 3        | > .10            |

Best-fitting model = 5 classes

| Class  | I   |     | II   |     | III  |     | IV   |      | V    |      | F(df=4, 6849) | p      | SNK (alpha=.01)       |
|--------|-----|-----|------|-----|------|-----|------|------|------|------|---------------|--------|-----------------------|
| N      | 170 |     | 767  |     | 2161 |     | 2632 |      | 1124 |      |               |        |                       |
| %      | 2.5 |     | 11.2 |     | 31.5 |     | 38.4 |      | 16.4 |      |               |        |                       |
| Scores | M   | SD  | M    | SD  | M    | SD  | M    | SD   | M    | SD   |               |        |                       |
| DANCON | 0.4 | 0.7 | 3.7  | 2.6 | 10.9 | 4.3 | 21.5 | 6.7  | 35.9 | 7.5  | 5379.29       | < .001 | I < II < III < IV < V |
| SEC    | 0.2 | 0.4 | 1.1  | 1.5 | 3.7  | 3.0 | 8.7  | 4.6  | 16.4 | 5.1  | 2673.90       | < .001 | I < II < III < IV < V |
| XEN    | 0.1 | 0.4 | 0.8  | 1.4 | 2.8  | 3.0 | 7.1  | 5.2  | 15.0 | 6.0  | 1864.90       | < .001 | I < II < III < IV < V |
| TSS    | 0.1 | 0.2 | 0.2  | 0.7 | 1.2  | 1.9 | 4.4  | 4.1  | 11.6 | 6.2  | 1728.83       | < .001 | I, II < III < IV < V  |
| CHE    | 0.2 | 0.5 | 2.1  | 2.3 | 3.9  | 3.2 | 7.3  | 4.3  | 13.3 | 5.7  | 1383.60       | < .001 | I < II < III < IV < V |
| CSSTOT | 0.9 | 0.9 | 7.9  | 2.8 | 22.5 | 5.6 | 49.0 | 10.7 | 92.2 | 18.0 | 11475.25      | < .001 | I < II < III < IV < V |

Cross-tabulation of latent classes with PHQ-4 classifications

| PHQ-4 total scores | Interpretation |
|--------------------|----------------|
| 0-2                | normal         |
| 3-5                | mild           |
| 6-8                | moderate       |
| 9-12               | severe         |

| Class | N      |      |          |        |      | % (by PHQ-4) |      |          |        | % (by Latent Class) |                    |
|-------|--------|------|----------|--------|------|--------------|------|----------|--------|---------------------|--------------------|
|       | normal | mild | moderate | severe | tot  | normal       | mild | moderate | severe | normal or mild      | moderate or severe |
| 1     | 149    | 11   | 7        | 3      | 170  | 88           | 6    | 4        | 2      | 94                  | 6                  |
| 2     | 674    | 72   | 8        | 13     | 767  | 88           | 9    | 1        | 2      | 97                  | 3                  |
| 3     | 1562   | 418  | 133      | 48     | 2161 | 72           | 19   | 6        | 2      | 92                  | 8                  |
| 4     | 1137   | 775  | 460      | 260    | 2632 | 43           | 29   | 17       | 10     | 73                  | 27                 |
| 5     | 191    | 274  | 300      | 359    | 1124 | 17           | 24   | 27       | 32     | 41                  | 59                 |

### Scores on CSSTOT

|           | M    | SD   |
|-----------|------|------|
| Asian     | 50.2 | 29.7 |
| Black     | 46.6 | 31.7 |
| Hispanic  | 51.5 | 32.4 |
| Caucasian | 39.0 | 27.3 |

### Comparisons on CSStot

$F(3,6528) = 60.86, p < .001$

SNK ( $p < .01$ ):

Caucasian < Black, Asian, Hispanic

Black < Hispanic

Black = Asian

Hispanic = Asian

**Group comparisons: DV= CSSTOT**

|                                                 | Female |      | Male |      |       |      |        |
|-------------------------------------------------|--------|------|------|------|-------|------|--------|
|                                                 | M      | SD   | M    | SD   | t     | df   | p      |
| Female gender                                   | 46.6   | 29.5 | 37.8 | 27.7 | 12.64 | 6845 | < .001 |
| College                                         | No     |      | Yes  |      |       |      |        |
|                                                 | M      | SD   | M    | SD   | t     | df   | p      |
|                                                 | 45.0   | 30.5 | 41.1 | 28.3 | 4.52  | 6852 | < .001 |
| Unemployed                                      | No     |      | Yes  |      |       |      |        |
|                                                 | M      | SD   | M    | SD   | t     | df   | p      |
|                                                 | 41.6   | 28.8 | 45.2 | 29.0 | 3.12  | 6852 | 0.002  |
| Diagnosis of COVID-19                           | No     |      | Yes  |      |       |      |        |
|                                                 | M      | SD   | M    | SD   | t     | df   | p      |
|                                                 | 41.1   | 28.1 | 80.0 | 36.0 | 16.13 | 6852 | < .001 |
| Country                                         | Cda    |      | US   |      |       |      |        |
|                                                 | M      | SD   | M    | SD   | t     | df   | p      |
|                                                 | 41.1   | 27.5 | 42.8 | 30.1 | 2.36  | 6852 | 0.018  |
| Preexisting medical condition                   | No     |      | Yes  |      |       |      |        |
|                                                 | M      | SD   | M    | SD   | t     | df   | p      |
|                                                 | 41.7   | 28.6 | 42.2 | 29.1 | 0.58  | 6846 | 0.563  |
| Preexisting (past year) mental health condition | No     |      | Yes  |      |       |      |        |
|                                                 | M      | SD   | M    | SD   | t     | df   | p      |
|                                                 | 40.0   | 28.0 | 50.4 | 30.8 | 11.7  | 6845 | < .001 |
| Healthcare worker who might come in contact     | No     |      | Yes  |      |       |      |        |
|                                                 | M      | SD   | M    | SD   | t     | df   | p      |
|                                                 | 41.9   | 28.7 | 43.3 | 31.7 | 0.81  | 6847 | 0.418  |
| Other occupation of incr risk                   | No     |      | Yes  |      |       |      |        |
|                                                 | M      | SD   | M    | SD   | t     | df   | p      |
|                                                 | 41.8   | 29.0 | 42.9 | 28.2 | 1.2   | 6848 | 0.231  |

|                                           | No   |      | Yes  |      |       |      |        |
|-------------------------------------------|------|------|------|------|-------|------|--------|
|                                           | M    | SD   | M    | SD   | t     | df   | p      |
| Wear a facemask because of COVID concerns | 39.0 | 27.0 | 63.5 | 32.6 | 23.67 | 6841 | < .001 |

**Stressors encountered during self-isolation: DV = CSSTOT**

| No   |      | Yes  |      | t     | df   | p      |                                                    |
|------|------|------|------|-------|------|--------|----------------------------------------------------|
| M    | SD   | M    | SD   |       |      |        |                                                    |
| 41.9 | 27.2 | 58.1 | 33.2 | 13.44 | 3300 | < .001 | Running low on food                                |
| 42.1 | 27.2 | 64.0 | 34.1 | 15.88 | 3298 | < .001 | Running low on cleaning supplies                   |
| 42.1 | 27.2 | 64.0 | 34.1 | 15.88 | 3298 | < .001 | Running low on prescription medicines              |
| 42.1 | 27.4 | 61.6 | 33.0 | 14.87 | 3300 | < .001 | Running low on toiletries                          |
| 44.2 | 28.4 | 78.0 | 36.4 | 12.54 | 3298 | < .001 | Difficulty taking care of a pet or pets            |
| 42.5 | 27.7 | 58.7 | 32.9 | 12.47 | 3300 | < .001 | Fights or arguments with people                    |
| 40.6 | 26.9 | 56.8 | 31.7 | 14.97 | 3300 | < .001 | Financial problems                                 |
| 41.9 | 28.0 | 53.7 | 30.8 | 10.71 | 3297 | < .001 | Running out of things to do                        |
| 42.2 | 27.8 | 60.7 | 32.1 | 14.05 | 3299 | < .001 | Not having enough physical space to move around in |
| 43.3 | 28.1 | 59.3 | 33.6 | 10.77 | 3295 | < .001 | Not having enough personal space                   |
| 44.4 | 28.6 | 66.5 | 37.9 | 8.92  | 3296 | < .001 | Difficulty taking care of children                 |
| 44.7 | 28.8 | 64.1 | 36.8 | 7.52  | 3301 | < .001 | Difficulty taking care of an elderly loved one     |
| 46.7 | 29.7 | 40.5 | 27.5 | 4.88  | 3302 | < .001 | Lives alone                                        |

**Coping with self-isolation: DV = CSSTOT**

| No   |      | Yes  |      | t     | df   | p      |                                                                                                                                               |
|------|------|------|------|-------|------|--------|-----------------------------------------------------------------------------------------------------------------------------------------------|
| M    | SD   | M    | SD   |       |      |        |                                                                                                                                               |
| 40.0 | 26.5 | 51.8 | 31.3 | 11.00 | 3302 | < .001 | tried it;<br>yes/no Set a schedule or routine for myself, such as setting specific times for meals                                            |
| 35.4 | 25.6 | 48.5 | 29.8 | 11.08 | 3302 | < .001 | tried it;<br>yes/no Spent time connecting with people via the internet (e.g., social media)                                                   |
| 41.3 | 27.0 | 56.4 | 32.6 | 13.49 | 3302 | < .001 | tried it;<br>yes/no Asked friends or family to deliver food or other things to my door                                                        |
| 42.8 | 27.8 | 46.3 | 30.0 | 2.94  | 3302 | 0.003  | tried it;<br>yes/no Spent time reading or writing                                                                                             |
| 40.1 | 26.6 | 47.1 | 30.1 | 5.93  | 3302 | < .001 | tried it;<br>yes/no Spent time on hobbies                                                                                                     |
| 37.0 | 29.7 | 45.7 | 29.3 | 3.23  | 3302 | 0.001  | tried it;<br>yes/no Watched TV or movies                                                                                                      |
| 40.8 | 25.8 | 49.0 | 31.4 | 8.01  | 3302 | < .001 | tried it;<br>yes/no Played video games or computer games                                                                                      |
| 37.9 | 25.9 | 47.5 | 30.0 | 7.87  | 3302 | < .001 | tried it;<br>yes/no Spent time cooking                                                                                                        |
| 40.0 | 26.2 | 50.7 | 31.4 | 10.68 | 3302 | < .001 | tried it;<br>yes/no Tried new recipes                                                                                                         |
| 32.9 | 24.1 | 52.8 | 29.7 | 19.83 | 3302 | < .001 | tried it;<br>yes/no Searched the Internet for news on COVID-19                                                                                |
| 38.2 | 25.0 | 57.9 | 32.2 | 19.62 | 3302 | < .001 | tried it;<br>yes/no Searched the Internet for new ways of keeping myself occupied (e.g., signed up for an online course or found a new hobby) |
| 36.1 | 27.8 | 47.3 | 29.4 | 8.19  | 3302 | < .001 | tried it;<br>yes/no Spent time talking with or texting friends on my phone                                                                    |
| 34.3 | 24.3 | 47.6 | 29.8 | 9.75  | 3302 | < .001 | tried it;<br>yes/no Kept busy cleaning or tidying up                                                                                          |
| 41.2 | 26.6 | 51.9 | 32.2 | 10.45 | 3302 | < .001 | tried it;<br>yes/no Kept busy by working at my job from home                                                                                  |
| 41.1 | 26.6 | 60.0 | 33.5 | 16.14 | 3302 | < .001 | tried it;<br>yes/no Kept busy by trying to keep my children entertained                                                                       |
| 41.5 | 27.3 | 48.4 | 30.6 | 6.75  | 3302 | < .001 | tried it;<br>yes/no Exercised (e.g., weights, sit-ups, stationary bicycle)                                                                    |
| 41.5 | 26.9 | 58.0 | 33.1 | 14.32 | 3302 | < .001 | tried it;<br>yes/no Yoga                                                                                                                      |
| 41.1 | 26.4 | 57.8 | 33.6 | 14.79 | 3302 | < .001 | tried it;<br>yes/no Meditation                                                                                                                |
| 40.6 | 26.6 | 57.4 | 32.4 | 15.31 | 3302 | < .001 | tried it;<br>yes/no Practiced relaxation exercises                                                                                            |
| 36.7 | 24.9 | 50.6 | 30.6 | 13.44 | 3302 | < .001 | tried it;<br>yes/no Reminded myself that it would soon be over                                                                                |

|      |      |      |      |       |      |        |                     |                                                                                 |
|------|------|------|------|-------|------|--------|---------------------|---------------------------------------------------------------------------------|
| 33.9 | 25.7 | 47.8 | 29.6 | 10.31 | 3302 | < .001 | tried it;<br>yes/no | Reminded myself that self-isolation is important for helping my community       |
| 36.7 | 25.1 | 54.9 | 30.8 | 18.74 | 3302 | < .001 | tried it;<br>yes/no | Ate more than I normally would                                                  |
| 41.1 | 27.0 | 58.2 | 32.4 | 15.11 | 3302 | < .001 | tried it;<br>yes/no | Consumed more alcohol or recreational drugs than I normally would               |
| 37.4 | 25.5 | 51.7 | 30.7 | 14.30 | 3302 | < .001 | tried it;<br>yes/no | Slept more than I normally would                                                |
| 42.2 | 27.3 | 56.5 | 33.3 | 11.95 | 3302 | < .001 | tried it;<br>yes/no | Searched for porn on the internet                                               |
| 38.9 | 26.2 | 51.7 | 30.9 | 12.76 | 3302 | < .001 | tried it;<br>yes/no | Shopped online                                                                  |
| 37.3 | 24.8 | 61.3 | 31.3 | 24.00 | 3302 | < .001 | tried it;<br>yes/no | Monitored my symptoms (e.g., checked my temperature)                            |
| 42.2 | 27.2 | 66.8 | 34.1 | 17.05 | 3302 | < .001 | tried it;<br>yes/no | Met with a doctor or counsellor via the internet (e.g., phone, Skype, FaceTime) |

**Correlation with CSSTOT (positive r = more effective coping strategy)**

| r      | no. of respondents who used the strategy | % of respondents who tried the coping strategy | If a coping strategy was tried, rating of its effectiveness                                                               |
|--------|------------------------------------------|------------------------------------------------|---------------------------------------------------------------------------------------------------------------------------|
| .02    | 3,181                                    | 96                                             | Watched TV or movies                                                                                                      |
| .09*** | 2,760                                    | 84                                             | Kept busy cleaning or tidying up                                                                                          |
| .08*** | 2,754                                    | 83                                             | Spent time talking with or texting friends on my phone                                                                    |
| .05**  | 2,746                                    | 83                                             | Reminded myself that self-isolation is important for helping my community                                                 |
| .07*** | 2,573                                    | 78                                             | Spent time cooking                                                                                                        |
| .05    | 2,526                                    | 76                                             | Spent time connecting with people via the internet (e.g., social media)                                                   |
| -.05   | 2,495                                    | 76                                             | Spent time on hobbies                                                                                                     |
| -.04   | 2,467                                    | 75                                             | Spent time reading or writing                                                                                             |
| .19*** | 2,080                                    | 63                                             | Searched the Internet for news on COVID-19                                                                                |
| .02    | 2,076                                    | 63                                             | Reminded myself that it would soon be over                                                                                |
| .01    | 1,865                                    | 56                                             | Played video games or computer games                                                                                      |
| -.05   | 1,861                                    | 56                                             | Exercised (e.g., weights, sit-ups, stationary bicycle)                                                                    |
| .14*** | 1,856                                    | 56                                             | Slept more than I normally would                                                                                          |
| .18*** | 1,680                                    | 51                                             | Shopped online                                                                                                            |
| .05    | 1,665                                    | 50                                             | Tried new recipes                                                                                                         |
| .24*** | 1,581                                    | 48                                             | Ate more than I normally would                                                                                            |
| -.02   | 1,521                                    | 46                                             | Set a schedule or routine for myself, such as setting specific times for meals                                            |
| -.03   | 1,308                                    | 40                                             | Kept busy by working at my job from home                                                                                  |
| .15*** | 1,217                                    | 37                                             | Searched the Internet for new ways of keeping myself occupied (e.g., signed up for an online course or found a new hobby) |
| .19*** | 1,116                                    | 34                                             | Monitored my symptoms (e.g., checked my temperature)                                                                      |
| .05    | 945                                      | 29                                             | Practiced relaxation exercises                                                                                            |
| -.01   | 900                                      | 27                                             | Asked friends or family to deliver food or other things to my door                                                        |
| .00    | 858                                      | 26                                             | Meditation                                                                                                                |
| .17*** | 841                                      | 25                                             | Consumed more alcohol or recreational drugs than I normally would                                                         |
| -.03   | 788                                      | 24                                             | Yoga                                                                                                                      |
| .10**  | 754                                      | 23                                             | Kept busy by trying to keep my children entertained                                                                       |
| .20*** | 749                                      | 23                                             | Searched for porn on the internet                                                                                         |
| .19*** | 435                                      | 13                                             | Met with a doctor or counsellor via the internet (e.g., phone, Skype, FaceTime)                                           |

### Coefficient alpha for multi-item scales

| <b>Scale</b>                                                     | <b>alpha</b> | <b>M</b> | <b>SD</b> |
|------------------------------------------------------------------|--------------|----------|-----------|
| Patient Health Questionnaire-4                                   | 0.90         | 3.2      | 3.4       |
| Short Health Anxiety Inventory                                   | 0.90         | 10.9     | 6.7       |
| Anxiety Sensitivity Index-3                                      | 0.94         | 18.0     | 14.3      |
| Intolerance of Uncertainty Scale-12                              | 0.91         | 30.6     | 9.9       |
| Perceived Vulnerability to Disease Scale-Perceived infectibility | 0.86         | 23.8     | 8.1       |
| Perceived Vulnerability to Disease Scale-Germ avoidance          | 0.73         | 35.8     | 8.4       |
| Disgust Propensity Scale-Revised                                 | 0.82         | 16.1     | 4.1       |
| Disgust Sensitivity Scale-Revised                                | 0.79         | 12.9     | 4.7       |
| Obsessive-Compulsive Inventory, Revised, Contamination Subscale  | 0.86         | 3.3      | 3.2       |
| Obsessive-Compulsive Inventory, Revised, Checking Subscale       | 0.86         | 3.4      | 3.0       |
| COVID Stress Scales - DAN                                        | 0.95         | 18.0     | 11.7      |
| COVID Stress Scales - SEC                                        | 0.91         | 7.3      | 6.3       |
| COVID Stress Scales - XEN                                        | 0.93         | 6.2      | 6.3       |
| COVID Stress Scales - TSS                                        | 0.93         | 4.0      | 5.3       |
| COVID Stress Scales - CHE                                        | 0.85         | 6.5      | 5.4       |
| Beliefs in COVID-19 conspiracy theories                          | 0.85         | 4.6      | 3.3       |
| Hygiene behaviors                                                | 0.54         | 5.7      | 0.2       |
| Stockpiling behaviors                                            | 0.83         | 1.3      | 0.3       |
